# Supplementary material for: Serial analysis of mutation spectra (SAMS): a new approach for the determination of mutation spectra of site-specific DNA damage and their sequence dependence
Source: PubMed Central journal article supplement — Nucleic Acids Res. 2008 Sep 23;36(18):6004–12. doi: 10.1093/nar/gkn595 (PMC2566868; doi:10.1093/nar/gkn595), 2008-09-23
Supplement: gkn595_1.pdf [file gkn595_1.pdf]

## Serial analysis of mutation spectra (SAMS). A new approach for the determination of mutation spectra of site-specific DNA damage and their sequence dependence

Huafeng Fang, John-Stephen Taylor\*

Department of Chemistry, Washington University, St. Louis, MO 63130

\*To whom correspondence should be addressed. Tel. (314) 935-6721 Fax: (314) 935-4481; Email: taylor@wustl.edu

Supplementary Table 1. Statistical analysis of sequenced bypass products of 5'-NN-3'.

| 5'-NN-3' | obs <sup>a</sup> | obs-exp <sup>b</sup>  | (obs-exp) <sup>2</sup> /exp |
|----------|------------------|-----------------------|-----------------------------|
| AA       | 11               | -0.06                 | 0.00                        |
| AC       | 15               | 3.94                  | 1.40                        |
| AG       | 13               | 1.94                  | 0.34                        |
| AT       | 8                | -3.06                 | 0.85                        |
| CA       | 22               | 10.94                 | 10.81                       |
| CC       | 4                | -7.06                 | 4.51                        |
| CG       | 15               | 3.94                  | 1.40                        |
| CT       | 12               | 0.94                  | 0.08                        |
| GA       | 8                | -3.06                 | 0.85                        |
| GC       | 7                | -4.06                 | 1.49                        |
| GG       | 6                | -5.06                 | 2.32                        |
| GT       | 13               | 1.94                  | 0.34                        |
| TA       | 11               | -0.06                 | 0.00                        |
| TC       | 12               | 0.94                  | 0.08                        |
| TG       | 10               | -1.06                 | 0.10                        |
| TT       | 10               | -1.06                 | 0.10                        |
| total    | 177              |                       | 24.67                       |
|          |                  | X <sup>2</sup> (0.01) | 30.6                        |
|          |                  | X <sup>2</sup> (0.05) | 25                          |

<sup>a</sup> obs: observed, <sup>b</sup> exp: expected
